# Supplementary material for: Genome-wide DNA methylation profiles altered by Helicobacter pylori in gastric mucosa and blood leukocyte DNA
Source: PubMed Central journal article supplement (PMC5095064; doi:10.18632/oncotarget.9469), 2016-05-19
Supplement: oncotarget-07-37132-s001.pdf [file oncotarget-07-37132-s001.pdf]

## Genome-wide DNA methylation profiles altered by *Helicobacter pylori* in gastric mucosa and blood leukocyte DNA

### Supplementary Materials

**Supplementary Table S1: Characteristics of the subjects for methylation array detection**

|                                         | Case 1     | Case 2         | Case 3    | Case 4   | Case 5    | Case 6 | Case 7     | Case 8   |
|-----------------------------------------|------------|----------------|-----------|----------|-----------|--------|------------|----------|
| Age                                     | 47         | 53             | 48        | 47       | 42        | 55     | 55         | 43       |
| Sex <sup>a</sup>                        | F          | M              | F         | M        | F         | M      | M          | M        |
| Smoking                                 | No         | Yes            | No        | No       | Yes       | Yes    | Yes        | Yes      |
| Drinking                                | No         | No             | Yes       | Yes      | Yes       | Yes    | Yes        | Yes      |
| <i>H. pylori</i> treatment <sup>b</sup> | S          | S              | S         | S        | S         | S      | U          | U        |
| Diagnosis before treatment              | Severe CAG | Deep IM        | Severe SG | Mild CAG | Severe SG | SG     | Severe CAG | Mild CAG |
| Diagnosis after treatment               | Mild CAG   | Superficial IM | Mild SG   | Normal   | Mild CAG  | SG     | Mild CAG   | SG       |

<sup>a</sup>F: female M: male.

<sup>b</sup>S: successfully eradicated U: unsuccessfully eradicated.

CAG: chronic atrophic gastritis SG: superficial gastritis IM: intestinal metaplasia.

**Supplementary Table S2: Gene ontology analysis by differentially methylated CpGs from gastric mucosa.** See Supplementary\_Table\_S2

**Supplementary Table S3: KEGG pathway analysis by differentially methylated CpGs from gastric mucosa**

| Term                                     | Count | %   | P value | Benjamini |
|------------------------------------------|-------|-----|---------|-----------|
| <b>Hypermethylated after eradication</b> |       |     |         |           |
| B cell receptor signaling pathway        | 3     | 9.4 | 0.02    | 0.66      |
| T cell receptor signaling pathway        | 3     | 9.4 | 0.039   | 0.66      |
| Leukocyte transendothelial migration     | 3     | 9.4 | 0.046   | 0.57      |

**Supplementary Table S4: Top differentially methylated CpGs and genes in gastric mucosa and blood leukocytes.** See Supplementary\_Table\_S4

**Supplementary Table S5: Characteristics of the subjects for Stage II case-control validation**

|                  | <i>H. pylori</i> negative<br><i>n</i> (%) | <i>H. pylori</i> positive<br><i>n</i> (%) | <i>P</i> value |                    |
|------------------|-------------------------------------------|-------------------------------------------|----------------|--------------------|
| Age <sup>a</sup> |                                           |                                           |                |                    |
|                  | < 50                                      | 10 (40.0)                                 | 14 (56.0)      | 0.258 <sup>b</sup> |
|                  | ≥ 50                                      | 15 (60.0)                                 | 11 (44.0)      |                    |
| Sex              |                                           |                                           |                |                    |
|                  | Male                                      | 14 (56.0)                                 | 12 (48.0)      | 0.571 <sup>b</sup> |
|                  | Female                                    | 11 (44.0)                                 | 13 (52.0)      |                    |
| Smoking          |                                           |                                           |                |                    |
|                  | Yes                                       | 8 (32.0)                                  | 4 (16.0)       | 0.185 <sup>b</sup> |
|                  | No                                        | 17 (68.0)                                 | 21 (84.0)      |                    |
| Drinking         |                                           |                                           |                |                    |
|                  | Yes                                       | 10(40.0)                                  | 8(32.0)        | 0.556 <sup>b</sup> |
|                  | No                                        | 15(60.0)                                  | 17(68.0)       |                    |
| Pathology        |                                           |                                           |                |                    |
|                  | SG                                        | 18(72.0)                                  | 9(36.0)        | 0.021 <sup>b</sup> |
|                  | CAG                                       | 4(16.0)                                   | 13(52.0)       |                    |
|                  | IM                                        | 3(12.0)                                   | 3(12.0)        |                    |

<sup>a</sup>according to the median age, subjects were divided into two groups (< 50 and ≥ 50).

<sup>b</sup>Pearson's  $\chi^2$  test.

CAG: chronic atrophic gastritis SG: superficial gastritis IM: intestinal metaplasia.

**Supplementary Table S6: Characteristics of the subjects for Stage II self-comparison validation**

|                    | Unsuccessful eradication <i>n</i> (%) | Successful eradication <i>n</i> (%) | <i>P</i> value     |                    |
|--------------------|---------------------------------------|-------------------------------------|--------------------|--------------------|
| Age (Mean±SD)      | 52.22 ± 5.56                          | 51.92 ± 6.41                        | 0.876 <sup>a</sup> |                    |
| Sex                |                                       |                                     |                    |                    |
|                    | Male                                  | 9 (69.2)                            | 24 (64.9)          | 1.000 <sup>b</sup> |
|                    | Female                                | 4 (30.8)                            | 13 (35.1)          |                    |
| Smoking            |                                       |                                     |                    |                    |
|                    | Yes                                   | 4 (30.8)                            | 18 (48.6)          | 0.339 <sup>b</sup> |
|                    | No                                    | 9 (69.2)                            | 19 (51.4)          |                    |
| Drinking           |                                       |                                     |                    |                    |
|                    | Yes                                   | 8 (61.5)                            | 23 (62.2)          | 0.968 <sup>b</sup> |
|                    | No                                    | 5 (38.5)                            | 14 (37.8)          |                    |
| Baseline Pathology |                                       |                                     |                    |                    |
|                    | SG                                    | 8 (61.5)                            | 13 (35.1)          | 0.322 <sup>b</sup> |
|                    | CAG                                   | 3 (23.1)                            | 15 (40.5)          |                    |
|                    | IM                                    | 2 (15.4)                            | 9 (24.3)           |                    |

<sup>a</sup>*t*-test.

<sup>b</sup>Pearson's  $\chi^2$  test.

CAG: chronic atrophic gastritis SG: superficial gastritis IM: intestinal metaplasia.

**Supplementary Table S7: Primer sequences and DHPLC denaturing temperature for candidate genes**

| Gene name                                                                     | Primer | Sequence (5'→3')      | Product (bp) | Annealing temperature (°C) | DHPLC denaturing temperature (°C) |
|-------------------------------------------------------------------------------|--------|-----------------------|--------------|----------------------------|-----------------------------------|
| <b>Candidate genes in gastric mucosa</b>                                      |        |                       |              |                            |                                   |
| NEU1                                                                          | T4-F   | GATTAGGAGGTTGTTAGAG   | 425          | 55                         | 55                                |
|                                                                               | T4-R   | AATACCAATCCCTTCTTC    |              |                            |                                   |
| PLEKHG6                                                                       | T5-F   | GGGTGTTTGTATAGGTTGTT  | 635          | 56                         | 58                                |
|                                                                               | T5-R   | CTACCCAAAATCCTATCTCA  |              |                            |                                   |
| PRIC285                                                                       | T6-F   | TGTTGGTAGTATAGGAAGAGG | 565          | 59                         | 57.7                              |
|                                                                               | T6-R   | CTAACAACCAAACAAAACATA |              |                            |                                   |
| S1PR4                                                                         | T7-F   | AAGAAGGTAGTTAGGGTAGGG | 423          | 60                         | 57.0                              |
|                                                                               | T7-R   | CCAACACCACCAAACA      |              |                            |                                   |
| SPI1                                                                          | T9-F   | TGATAGTAAGTTAGGAGGGTA | 272          | 59                         | 58.1                              |
|                                                                               | T9-R   | ACAAACCTAAACCCTACAC   |              |                            |                                   |
| SYNM                                                                          | T10-F  | ATGTTGGGATTATAGGTTTG  | 500          | 58                         | 54.7                              |
|                                                                               | T10-R  | CTCCTACCCTAATCTTATCC  |              |                            |                                   |
| ARMC4                                                                         | T12-F  | GTGGGAGGTTTATAGGGT    | 408          | 55                         | 53.9                              |
|                                                                               | T12-R  | CTTCCTTCTACTCCATTTTA  |              |                            |                                   |
| GP1BB                                                                         | T14-F  | ATAGGAGAATAATGTTGGTG  | 402          | 55                         | 58.3                              |
|                                                                               | T14-R  | AAATCCCCTCTAAATCTAAC  |              |                            |                                   |
| KANK3                                                                         | T15-F  | GTAGGAAGGTGGGTGTTAAAG | 366          | 55                         | 54.8                              |
|                                                                               | T15-R  | CCACATTAATAATCCCAAAT  |              |                            |                                   |
| KCNQ3                                                                         | T16-F  | TGGGTTTTAAAGTTTTAGAGA | 537          | 55                         | 56.5                              |
|                                                                               | T16-R  | CTTCTTCCCAAAAACAACA   |              |                            |                                   |
| CELSR3                                                                        | T18-F  | GAGAAGGAGTAGGAGTATG   | 473          | 56                         | 55.6                              |
|                                                                               | T18-R  | TCTATTCAACACCAAAAACAA |              |                            |                                   |
| FOXQ1                                                                         | T19-F  | GGTGTTTAAGGTTGAAGG    | 388          | 58                         | 53.5                              |
|                                                                               | T19-R  | AACTCTACCCTAATCTTCC   |              |                            |                                   |
| <b>Candidate genes in blood leukocytes</b>                                    |        |                       |              |                            |                                   |
| GNAS                                                                          | B5-F   | TAGGTTTGTAAGGTTGG     | 458          | 52                         | 54.7                              |
|                                                                               | B5-R   | CTTCCTCCTCAACTAAAA    |              |                            |                                   |
| BCOR                                                                          | B8-F   | GGAGGAAGTTAAAATAGGTTT | 314          | 57                         | 52.0                              |
|                                                                               | B8-R   | CCCAAAACATTTTATACACAC |              |                            |                                   |
| LTBR                                                                          | B10-F  | GGTTGGGTTAGGGTTGTT    | 431          | 55                         | 55.7                              |
|                                                                               | B10-R  | ACCCAAAACAAAACATAAC   |              |                            |                                   |
| <b>Overlapped candidate genes between gastric mucosa and blood leukocytes</b> |        |                       |              |                            |                                   |
| MTERF                                                                         | TB2-F  | GGGTTTGGGATTTTATAGT   | 242          | 58                         | 55.5                              |
|                                                                               | TB2-R  | TAAACAAACAAAATCTACACC |              |                            |                                   |

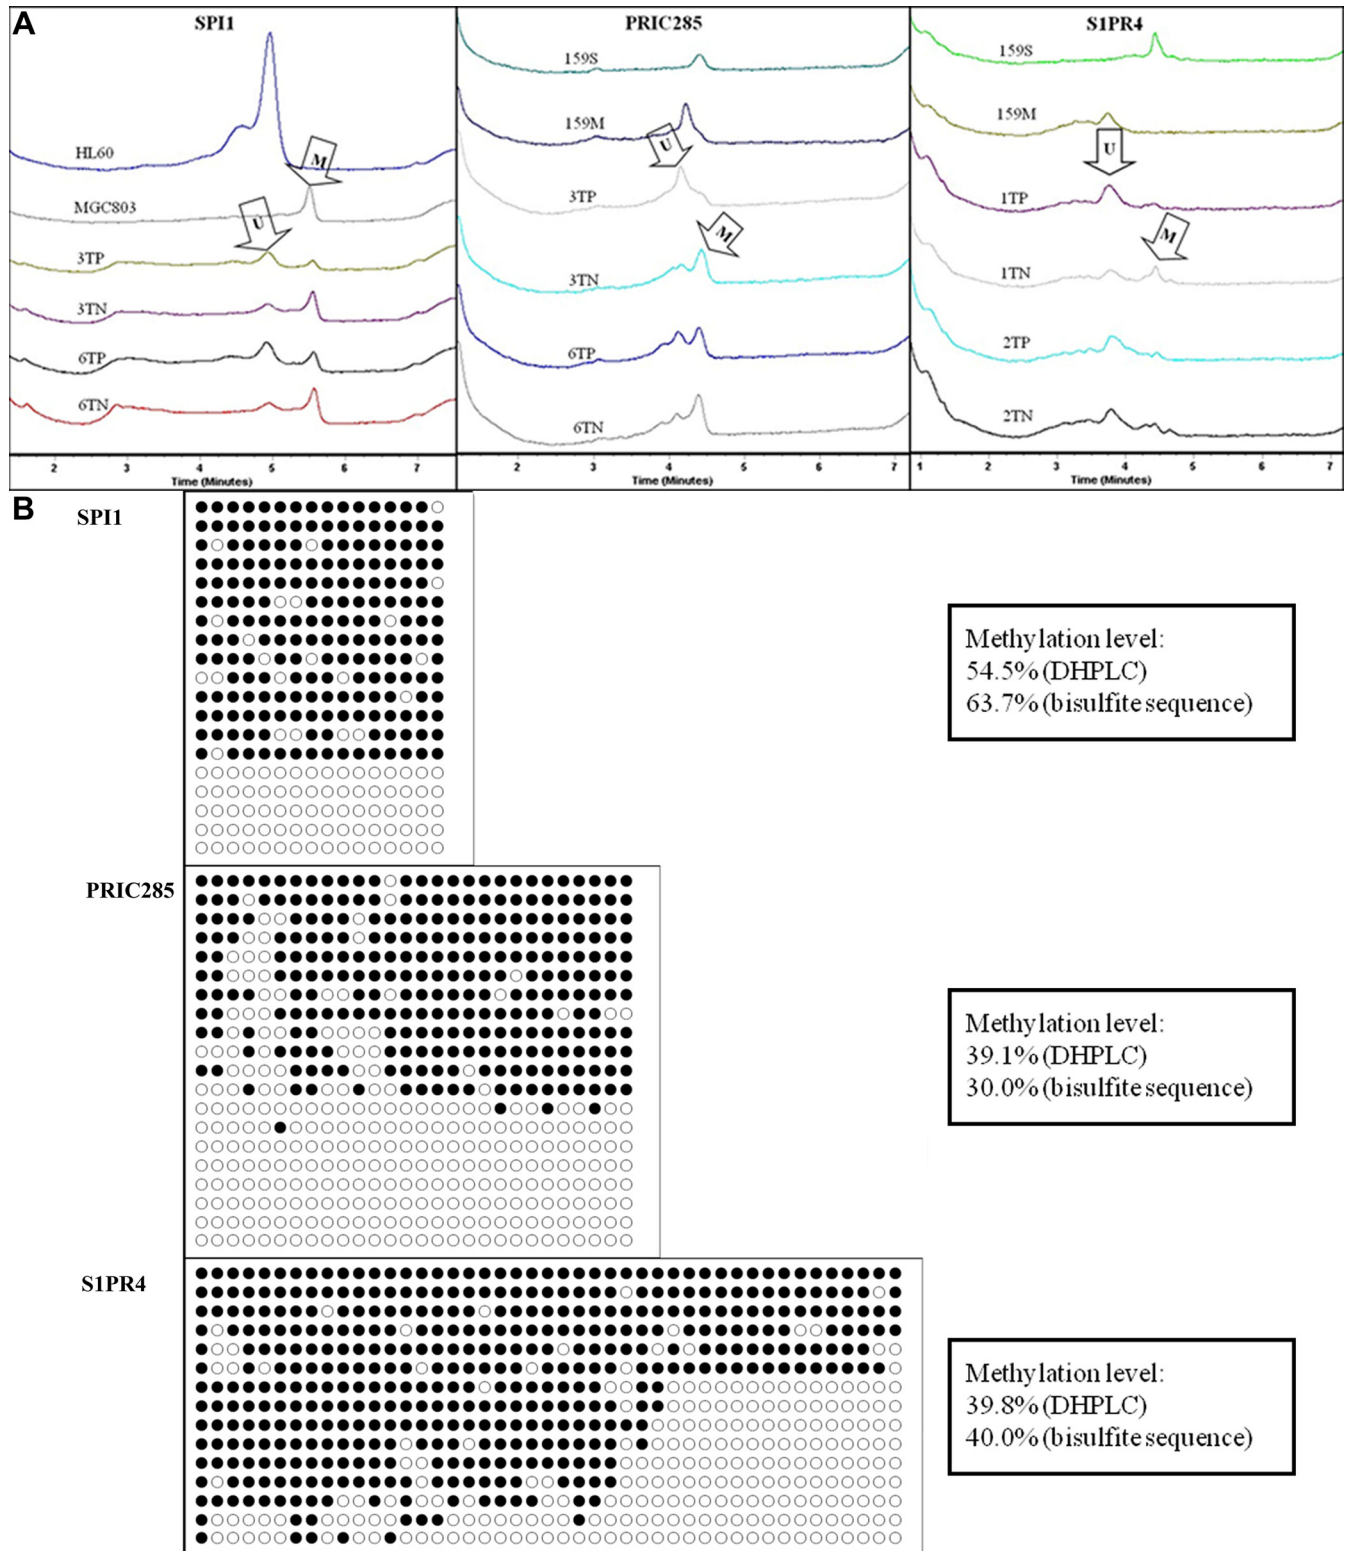

**Supplementary Figure S1: Methylation detection of *SPI1*, *PRIC285* and *SIPR4* genes in gastric mucosa samples.** (A) Representative DHPLC chromatograms of bisulfite PCR amplicons of *SPI1*, *PRIC285* and *SIPR4* CGIs, respectively. The methylated (M) and unmethylated (U) PCR products of each gene were separated by the DNasep analytical column at partial denaturing temperature as described in the Materials and Methods section. The peak areas corresponding to the methylated and unmethylated PCR products were used to calculate the percentage of methylated copies (methylated-peak area/total peak area) for each gene analyzed. (B) Representative bisulfite clone sequencing figures of *SPI1*, *PRIC285* and *SIPR4* genes and the comparison of the proportions of hypermethylated clones (> 80% CpGs were methylated in one clone) with corresponding DHPLC results of the same samples. The dark dots represent methylated CpGs.
